# Supplementary material
Source: HighWire-hosted journal article supplement (https://bmjopen.bmj.com/content/14/9/e084516)
Supplement: inline-supplementary-material-2 [file inline-supplementary-material-2.pdf]

## Supplementary File 2 – Search Strategy

The following were searched using the parameter Title/Abstract in MEDLINE

1. coronary artery calcium OR CAC OR coronary artery calcification
2. coronary artery plaque OR coronary plaque
3. coronary atherosclerosis
4. coronary artery calcium score OR calcium score OR coronary calcium score OR CAC score
5. 1 + 2 + 3 + 4
6. bisphosphonate OR bisphosphonates
7. alendronate OR alendronic acid
8. etidronate OR etidronic acid
9. pamidronate OR pamidronic acid
10. zoledronate OR zoledronic acid
11. risedronate OR risedronic acid
12. ibandronate OR ibandronic acid
13. minodronate OR minodronic acid
14. neridronate OR neridronic acid
15. RANKL OR RANKL inhibitor OR RANK-L or RANK-L inhibitor
16. denosumab
17. 6 + 7 + 8 + 9 + 10 + 11 + 12 + 13 + 14 + 15 + 16
18. 5 AND 17
19. Limited to studies published in English, only

The following were searched using the parameter Keyword in EMBASE

1. coronary artery calcium OR CAC OR coronary artery calcification OR coronary artery plaque OR coronary plaque OR coronary atherosclerosis OR coronary artery calcium score OR calcium score OR coronary calcium score OR CAC score
2. bisphosphonate OR bisphosphonates OR alendronate OR alendronic acid OR etidronate OR etidronic acid OR pamidronate OR pamidronic acid OR zoledronate OR zoledronic acid OR risedronate OR risedronic acid OR ibandronate OR ibandronic acid OR minodronate OR minodronic acid OR neridronate OR neridronic acid OR RANKL OR RANKL inhibitor OR RANK-L or RANK-L inhibitor OR denosumab
3. 1 AND 2
4. Limited to studies published in English, only

The following were searched using the parameter Title/Abstract/Keyword in Cochrane CENTRAL

1. coronary artery calcium OR CAC OR coronary artery calcification OR coronary artery plaque OR coronary plaque OR coronary atherosclerosis OR coronary artery calcium score OR calcium score OR coronary calcium score OR CAC score - (Word variations have been searched)
2. bisphosphonate OR bisphosphonates OR alendronate OR alendronic acid OR etidronate OR etidronic acid OR pamidronate OR pamidronic acid OR zoledronate OR zoledronic acid OR risedronate OR risedronic acid OR ibandronate OR ibandronic acid OR minodronate OR minodronic acid OR neridronate OR neridronic acid OR RANKL OR RANKL inhibitor OR RANK-L or RANK-L inhibitor OR denosumab (Word variations have been searched)
3. 1 AND 2
4. At the study selection stage, included studies were confined to English, only
